# Supplementary material
Source: Springer Nature journal article supplement (https://www.springermedizin.de/resource/supplementary/12889_2010_2140_MOESM1_ESM.pdf/9484698)

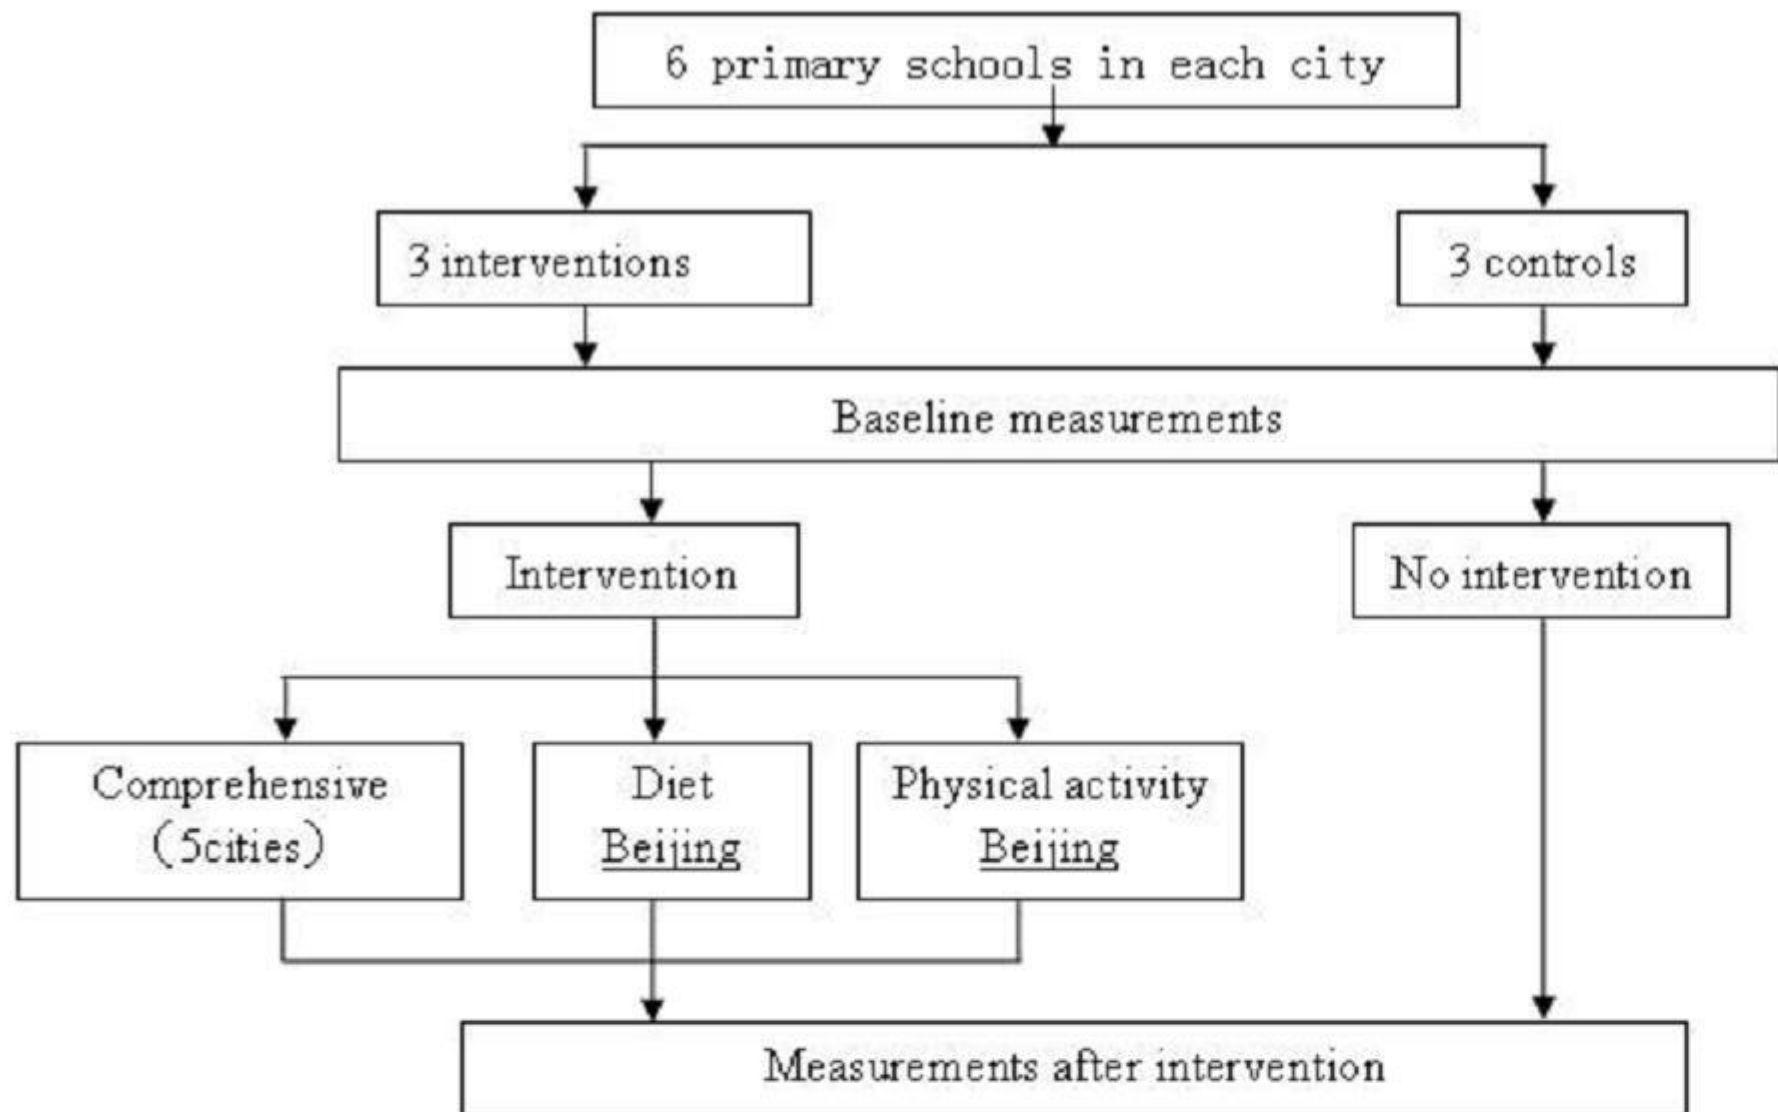

Supplement: MOESM1 [file 9484698]
